# Supplementary material for: The immunosuppressive capacity of human mesenchymal stromal cells derived from amnion and bone marrow
Source: PubMed Central journal article supplement — Biochem Biophys Rep. 2016 Aug 3;8:34–40. doi: 10.1016/j.bbrep.2016.07.019 (PMC5613701; doi:10.1016/j.bbrep.2016.07.019), 2016-08-03
Supplement: mmc2.pdf [file mmc2.pdf]

To view the full contents of this document, you need a later version of the PDF viewer. You can upgrade to the latest version of Adobe Reader from [www.adobe.com/products/acrobat/readstep2.html](http://www.adobe.com/products/acrobat/readstep2.html)

For further support, go to [www.adobe.com/support/products/acrreader.html](http://www.adobe.com/support/products/acrreader.html)
